# Supplementary material
Source: PubMed Central journal article supplement (PMC3182355)
Supplement: mt2011138x2.pdf [file mt2011138x2.pdf]

Relative  
transduction  
efficiency (%)

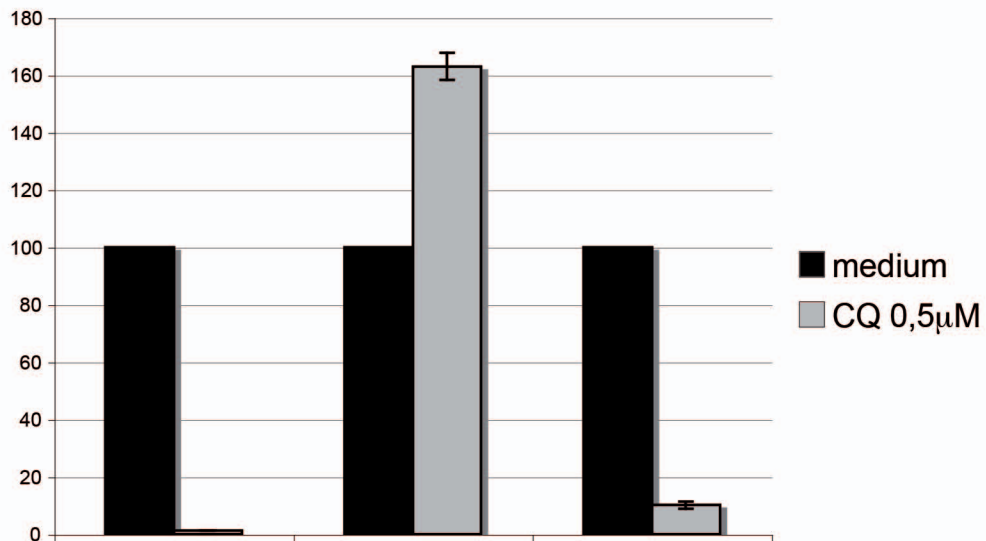

|                              | Lane 1 | Lane 2        | Lane 3          |
|------------------------------|--------|---------------|-----------------|
| Envelope of YFP lentivectors | VSV-G  | Eco           | Eco             |
| HEK293T target cells         | naive  | stable mCAT-1 | mCAT-1 Gesicles |
