# Supplementary material
Source: PubMed Central journal article supplement (PMC3182355)
Supplement: mt2011138x3.pdf [file mt2011138x3.pdf]

a

| gene name  | gene description                                     | uniprot id                   | empai | gene name | gene description                                               | uniprot id                   | empai |
|------------|------------------------------------------------------|------------------------------|-------|-----------|----------------------------------------------------------------|------------------------------|-------|
| ATP1A1 *   | Sodium/potassium-transporting ATPase subunit alpha-1 | <a href="#">AT1A1_HUMAN</a>  | 3,79  | MTHFD1    | C-1-tetrahydrofolate synthase, cytoplasmic                     | <a href="#">C1TC_HUMAN</a>   | 0,62  |
| HSPA8 *    | Heat shock cognate 71 kDa protein                    | <a href="#">HSP7C_HUMAN</a>  | 2,97  |           | cDNA FLJ42590 fis, clone BRACE3009708                          | <a href="#">B3KW93_HUMAN</a> | 0,62  |
| ACTB *     | Actin, cytoplasmic 1                                 | <a href="#">ACTB_HUMAN</a>   | 2,96  | TFRC      | Transferrin receptor protein 1                                 | <a href="#">TFR1_HUMAN</a>   | 0,60  |
| RPS27A     | Ubiquitin                                            | <a href="#">UBIQ_HUMAN</a>   | 2,75  | PTGFRN    | PTGFRN protein (Fragment)                                      | <a href="#">Q4QQP8_HUMAN</a> | 0,57  |
| BASP1      | Brain acid soluble protein 1                         | <a href="#">BASP1_HUMAN</a>  | 2,74  | TLN1      | Talin-1                                                        | <a href="#">TLN1_HUMAN</a>   | 0,56  |
| MSN *      | Moesin                                               | <a href="#">MOES_HUMAN</a>   | 2,70  | SCRIB     | Protein scribble homolog                                       | <a href="#">SCRIB_HUMAN</a>  | 0,55  |
| MARCKS *   | Myristoylated alanine-rich C-kinase substrate        | <a href="#">MARCS_HUMAN</a>  | 2,14  | KPNB1     | Importin subunit beta-1                                        | <a href="#">IMB1_HUMAN</a>   | 0,55  |
| SLC3A2 *   | 4F2 cell-surface antigen heavy chain                 | <a href="#">4F2_HUMAN</a>    | 2,08  | NCKAP1    | Nck-associated protein 1                                       | <a href="#">NCKP1_HUMAN</a>  | 0,53  |
| RDX        | Radinix                                              | <a href="#">RADI_HUMAN</a>   | 1,79  | CKB       | Creatine kinase B-type                                         | <a href="#">KCRB_HUMAN</a>   | 0,53  |
| EZR *      | Ezrin                                                | <a href="#">EZRI_HUMAN</a>   | 1,64  | RAP1A     | Ras-related protein Rap-1A                                     | <a href="#">RAP1A_HUMAN</a>  | 0,52  |
| HSPA1A     | Heat shock 70 kDa protein 1A/1B                      | <a href="#">HSP71_HUMAN</a>  | 1,61  | PDIA4     | Protein disulfide-isomerase A4                                 | <a href="#">PDIA4_HUMAN</a>  | 0,52  |
| HSP90AB1 * | Heat shock protein HSP 90-beta                       | <a href="#">HS90B_HUMAN</a>  | 1,60  | CTNND1    | Putative uncharacterized protein CTNND1                        | <a href="#">C9JZR2_HUMAN</a> | 0,52  |
| *          | cDNA FLJ54408                                        | <a href="#">B4E3B6_HUMAN</a> | 1,60  | YWHAE *   | 14-3-3 protein epsilon                                         | <a href="#">1433E_HUMAN</a>  | 0,51  |
| Slc7a1 *   | High affinity cationic amino acid transporter 1      | <a href="#">CTR1_MOUSE</a>   | 1,58  | PRDX2     | Peroxioredoxin-2                                               | <a href="#">PRDX2_HUMAN</a>  | 0,50  |
| IQGAP1     | Ras GTPase-activating-like protein IQGAP1            | <a href="#">IQGA1_HUMAN</a>  | 1,57  | ITGB1     | Integrin beta-1                                                | <a href="#">ITB1_HUMAN</a>   | 0,50  |
| HSP90AA1 * | Heat shock protein HSP 90-alpha                      | <a href="#">HS90A_HUMAN</a>  | 1,56  | PRDX1     | Peroxioredoxin-1                                               | <a href="#">PRDX1_HUMAN</a>  | 0,50  |
| HSPA5      | 78 kDa glucose-regulated protein                     | <a href="#">GRP78_HUMAN</a>  | 1,43  | PTGFRN    | Prostaglandin F2 receptor negative regulator                   | <a href="#">FPRP_HUMAN</a>   | 0,50  |
| ANXA6      | Annexin A6, isoform CRA_c                            | <a href="#">A8NN80_HUMAN</a> | 1,34  | SLC12A2   | Solute carrier family 12 member 2                              | <a href="#">S12A2_HUMAN</a>  | 0,49  |
| G *        | Glycoprotein G (Fragment)                            | <a href="#">VGLG_VSIVM</a>   | 1,29  | CTNND1    | Catenin delta-1                                                | <a href="#">CTND1_HUMAN</a>  | 0,49  |
| MYO1C *    | Myosin-1c                                            | <a href="#">MYO1C_HUMAN</a>  | 1,29  | UBA1      | Ubiquitin-like modifier-activating enzyme 1                    | <a href="#">UBA1_HUMAN</a>   | 0,48  |
| VCL        | Vinculin                                             | <a href="#">VINC_HUMAN</a>   | 1,27  | CYFIP1    | Cytoplasmic FMR1-interacting protein 1                         | <a href="#">CYFP1_HUMAN</a>  | 0,46  |
| EPB41L2 *  | Band 4.1-like protein 2                              | <a href="#">E41L2_HUMAN</a>  | 1,20  | HSPH1     | Heat shock protein 105 kDa                                     | <a href="#">HS105_HUMAN</a>  | 0,46  |
| CTNNA1     | Catenin alpha-1                                      | <a href="#">CTNA1_HUMAN</a>  | 1,08  | GNAI2     | Guanine nucleotide-binding protein G(i) subunit alpha-2        | <a href="#">GNAI2_HUMAN</a>  | 0,45  |
| MYH9       | Myosin-9                                             | <a href="#">MYH9_HUMAN</a>   | 1,02  | TUBA4A    | Tubulin alpha-4A chain                                         | <a href="#">TBA4A_HUMAN</a>  | 0,44  |
| ANXA2 *    | Annexin A2                                           | <a href="#">ANXA2_HUMAN</a>  | 1,02  | TUBA1B    | Tubulin alpha-1B chain                                         | <a href="#">TBA1B_HUMAN</a>  | 0,44  |
| EEF2 *     | Elongation factor 2                                  | <a href="#">EF2_HUMAN</a>    | 1,02  | STXBP3    | Syntaxin-binding protein 3                                     | <a href="#">STXB3_HUMAN</a>  | 0,43  |
| SLC1A5     | Neutral amino acid transporter B(0)                  | <a href="#">AAAT_HUMAN</a>   | 1,01  | HSPA4L    | Heat shock 70 kDa protein 4L                                   | <a href="#">H574L_HUMAN</a>  | 0,43  |
| HSP90B1    | Endoplasmic                                          | <a href="#">ENPL_HUMAN</a>   | 1,01  |           | cDNA FLJ53381, highly similar to Monocarboxylate transporter 1 | <a href="#">B4DKS0_HUMAN</a> | 0,42  |
| HSPA4      | Heat shock 70 kDa protein 4                          | <a href="#">HSP74_HUMAN</a>  | 0,97  | ATP1B1    | Sodium/potassium-transporting ATPase subunit beta-1            | <a href="#">AT1B1_HUMAN</a>  | 0,41  |
| JUP        | Junction plakoglobin                                 | <a href="#">PLAK_HUMAN</a>   | 0,96  | SLC16A1   | Monocarboxylate transporter 1                                  | <a href="#">MOT1_HUMAN</a>   | 0,40  |
| MYO1B      | Myosin-1b                                            | <a href="#">MYO1B_HUMAN</a>  | 0,91  | CYFIP2    | Cytoplasmic FMR1 interacting protein 2, isoform CRA_b          | <a href="#">D3DDQ3_HUMAN</a> | 0,40  |
| DRIP4      | Dopamine receptor interacting protein 4              | <a href="#">Q4W4Y1_HUMAN</a> | 0,89  | KIF23     | Kinesin-like protein KIF23                                     | <a href="#">KIF23_HUMAN</a>  | 0,40  |
|            | cDNA FLJ52405, highly similar to Myosin 1c           | <a href="#">B7Z9C0_HUMAN</a> | 0,87  | CLIC1     | Chloride intracellular channel protein 1                       | <a href="#">CLIC1_HUMAN</a>  | 0,39  |
|            | cDNA FLJ46689 fis, clone TRACH3012106                | <a href="#">B3KY28_HUMAN</a> | 0,85  | IGSF8     | Immunoglobulin superfamily member 8                            | <a href="#">IGSF8_HUMAN</a>  | 0,39  |
| CTNNB1     | Catenin beta-1                                       | <a href="#">CTNB1_HUMAN</a>  | 0,83  | PYGL      | Glycogen phosphorylase, liver form                             | <a href="#">PYGL_HUMAN</a>   | 0,37  |
| HBA1       | Hemoglobin subunit alpha                             | <a href="#">HBA_HUMAN</a>    | 0,78  | TUBB4     | Tubulin beta-4 chain                                           | <a href="#">TBB4_HUMAN</a>   | 0,36  |
| MYH10      | Myosin-10                                            | <a href="#">MYH10_HUMAN</a>  | 0,78  | TUBB      | Tubulin beta chain                                             | <a href="#">TBB5_HUMAN</a>   | 0,36  |
| PKM2       | Pyruvate kinase isozymes M1/M2                       | <a href="#">KPYM_HUMAN</a>   | 0,78  | CSE1L     | Exportin-2                                                     | <a href="#">XPO2_HUMAN</a>   | 0,36  |
|            | cDNA FLJ54004                                        | <a href="#">B4DJ76_HUMAN</a> | 0,77  | ACLY      | ATP-citrate synthase                                           | <a href="#">ACLY_HUMAN</a>   | 0,36  |
| FLNA *     | Filamin-A                                            | <a href="#">FLNA_HUMAN</a>   | 0,75  | EEF1A1    | Elongation factor 1-alpha 1                                    | <a href="#">EF1A1_HUMAN</a>  | 0,35  |
| VCP        | Transitional endoplasmic reticulum ATPase            | <a href="#">TERA_HUMAN</a>   | 0,73  | PLS3      | Plastin-3                                                      | <a href="#">PLST_HUMAN</a>   | 0,35  |
| MYO1D      | Myosin-1d                                            | <a href="#">MYO1D_HUMAN</a>  | 0,69  | MLLT4     | Afadin                                                         | <a href="#">AFAD_HUMAN</a>   | 0,35  |
| ENO1 *     | Alpha-enolase                                        | <a href="#">ENOA_HUMAN</a>   | 0,67  | GNAI3 *   | Guanine nucleotide-binding protein G(k) subunit alpha          | <a href="#">GNAI3_HUMAN</a>  | 0,35  |
| CLTC *     | Clathrin heavy chain 1                               | <a href="#">CLH1_HUMAN</a>   | 0,67  | DSG1      | Desmoglein-1                                                   | <a href="#">DSG1_HUMAN</a>   | 0,34  |
| DCD        | Dermcidin                                            | <a href="#">DCD_HUMAN</a>    | 0,66  | ATP2B4    | Plasma membrane calcium-transporting ATPase 4                  | <a href="#">AT2B4_HUMAN</a>  | 0,33  |
| ATP2B1     | Plasma membrane calcium-transporting ATPase 1        | <a href="#">AT2B1_HUMAN</a>  | 0,66  | ATP1B3    | Sodium/potassium-transporting ATPase subunit beta-3            | <a href="#">AT1B3_HUMAN</a>  | 0,33  |
| ACTN1      | Alpha-actinin-1                                      | <a href="#">ACTN1_HUMAN</a>  | 0,66  | PLXNB2    | Plexin-B2                                                      | <a href="#">PLXB2_HUMAN</a>  | 0,33  |
| FASN *     | Fatty acid synthase                                  | <a href="#">FAS_HUMAN</a>    | 0,66  | SCARB1    | SCARB1 protein                                                 | <a href="#">B7ZKQ9_HUMAN</a> | 0,33  |
| NPEPPS     | Puromycin-sensitive aminopeptidase                   | <a href="#">PSA_HUMAN</a>    | 0,65  | PI4KA     | Phosphatidylinositol 4-kinase alpha                            | <a href="#">PI4KA_HUMAN</a>  | 0,32  |
| BSG *      | Basigin                                              | <a href="#">BASI_HUMAN</a>   | 0,65  | IPO5      | Importin-5                                                     | <a href="#">IPOS_HUMAN</a>   | 0,31  |

b

| Term                                            | Count | p-value   |
|-------------------------------------------------|-------|-----------|
| GO:0048770~pigment granule                      | 20    | 1,12E-021 |
| GO:0042470~melanosome                           | 20    | 1,12E-021 |
| GO:0005829~cytosol                              | 37    | 3,62E-012 |
| GO:0016023~cytoplasmic membrane-bounded vesicle | 24    | 6,72E-011 |
| GO:0031988~membrane-bounded vesicle             | 24    | 9,82E-011 |
| GO:0031410~cytoplasmic vesicle                  | 24    | 9,61E-010 |
| GO:0031982~vesicle                              | 24    | 1,89E-009 |
| GO:0070161~anchoring junction                   | 11    | 7,06E-006 |
| GO:0015629~actin cytoskeleton                   | 13    | 6,37E-006 |
| GO:0031252~cell leading edge                    | 10    | 8,72E-006 |
| GO:0005912~adherens junction                    | 10    | 2,10E-005 |
| GO:0016323~basolateral plasma membrane          | 11    | 2,07E-005 |
| GO:0005856~cytoskeleton                         | 26    | 4,69E-005 |
| GO:0042995~cell projection                      | 18    | 5,49E-005 |
| GO:0005886~plasma membrane                      | 46    | 1,24E-004 |
| GO:0005938~cell cortex                          | 8     | 8,33E-004 |
| GO:0044459~plasma membrane part                 | 31    | 8,31E-004 |
| GO:0044445~cytosolic part                       | 8     | 9,49E-004 |
