# Supplementary material
Source: PubMed Central journal article supplement (PMC3182355)

**a**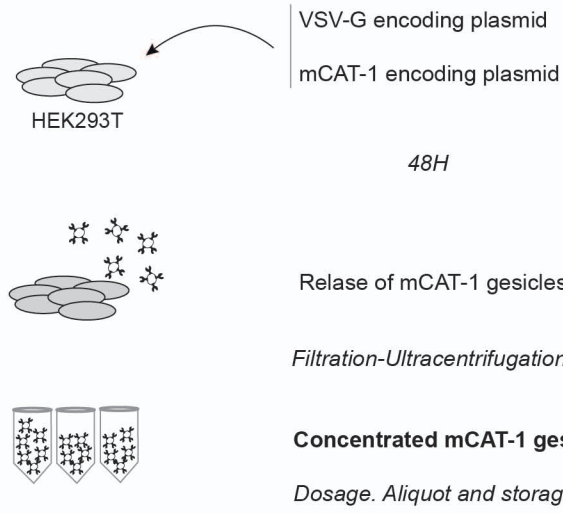**b**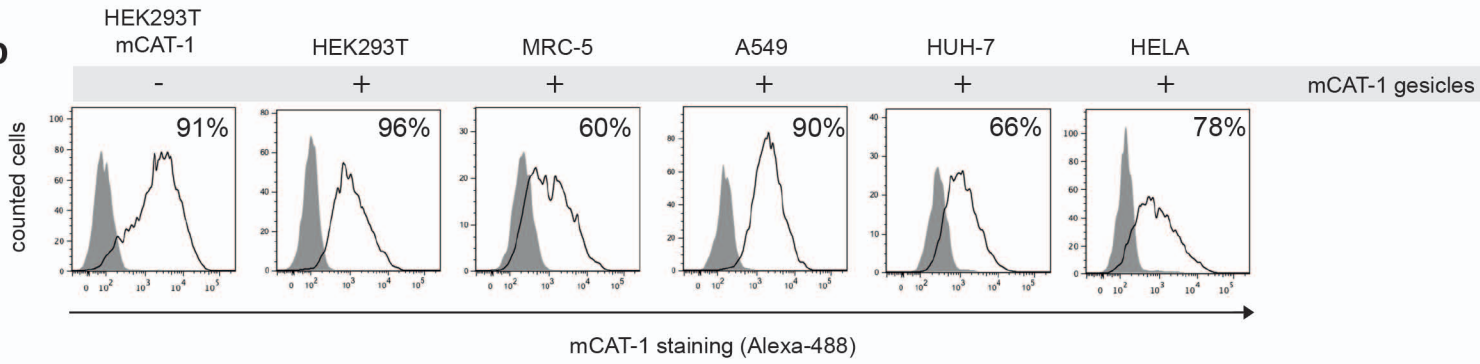**c**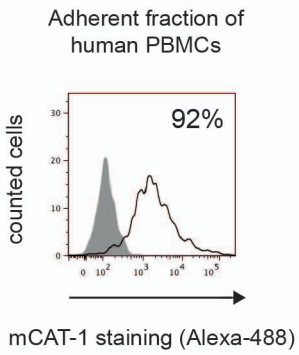**d**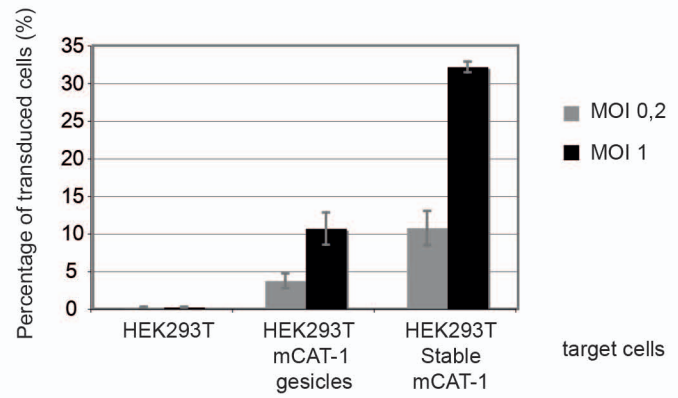

Supplement: mt2011138x1.pdf [file mt2011138x1.pdf]
